# Supplementary material
Source: Springer Nature journal article supplement (https://www.springermedizin.de/resource/supplementary/13041_2012_192_MOESM9_ESM.pdf/25657834)

**A**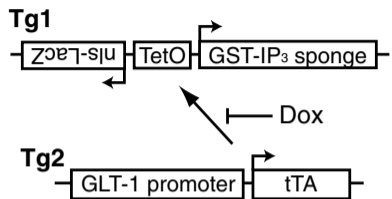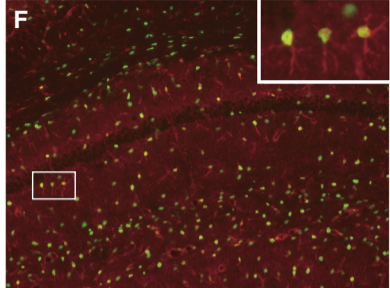

lacZ/S100B

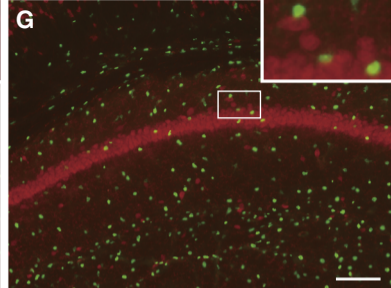

lacZ/NeuN

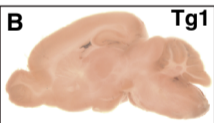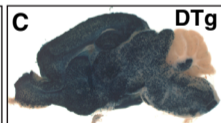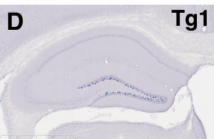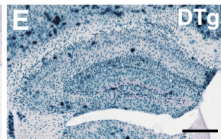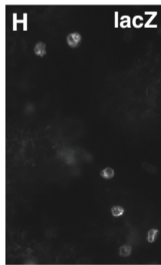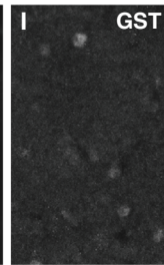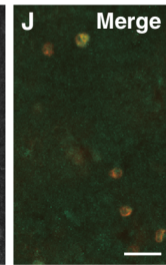

Supplement: MOESM9 [file 25657834]
